# Supplementary material for: Evaluation of mixed transition metal (Co, Mn, and Cu) oxide electrocatalysts anchored on different carbon supports for robust oxygen reduction reaction in neutral media
Source: Royal Society of Chemistry journal article supplement (doi:10.1039/d1ra07721j), 2022-01-01
Supplement: d1ra07721j1.pdf [file d1ra07721j1.pdf]

## Supporting information

### **Evaluation of mixed transition metal (Co, Mn, and Cu) oxides electrocatalysts anchored on different carbon supports for robust oxygen reduction reaction in neutral media**

**Dena Z. Khater <sup>a</sup>, R.S. Amin <sup>a</sup>, Mohamed Mahmoud <sup>b</sup> and K.M. El-Khatib <sup>a \*</sup>**

<sup>a</sup> Chemical Engineering & Pilot Plant Department, National Research Centre, 33 El-Buhouth St., Dokki, Cairo12311, Egypt

<sup>b</sup> Water Pollution Research Department, National Research Centre, 33 El-Buhouth St., Dokki, Cairo12311, Egypt

**Number of figures: 5**

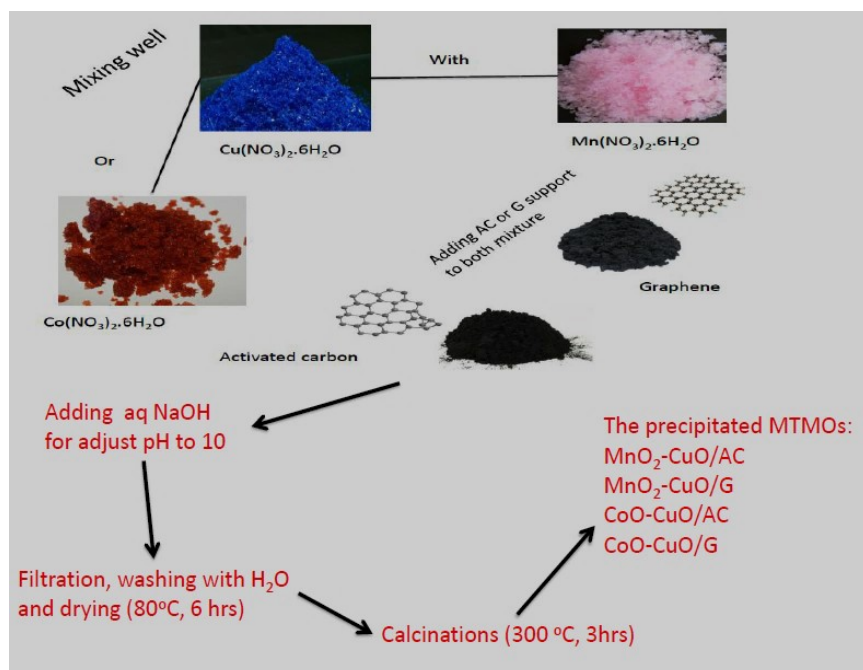

Figure S1. Synthesis of MTMOs electrocatalysts by precipitation of metal salts precursors.

**a**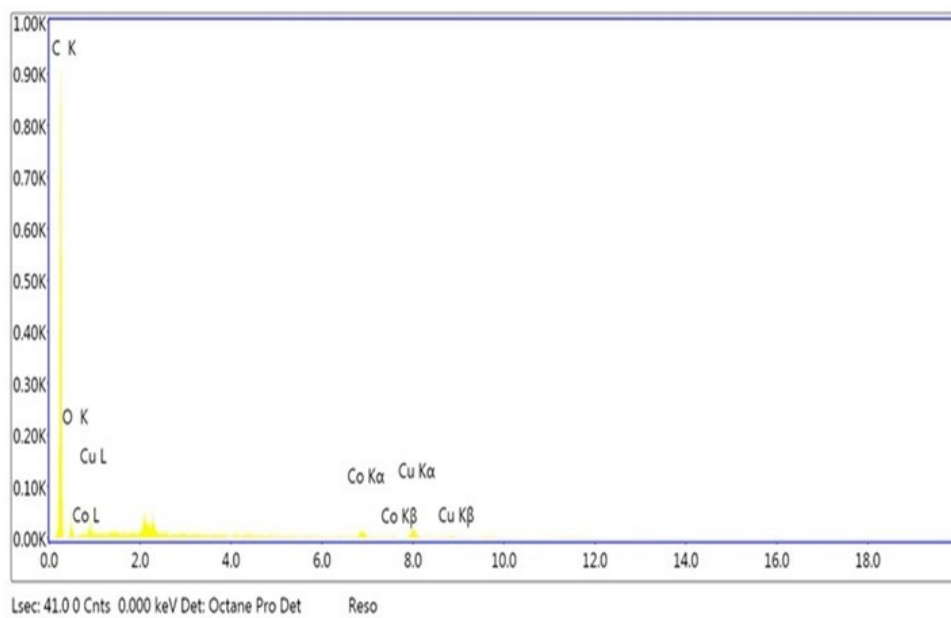**b**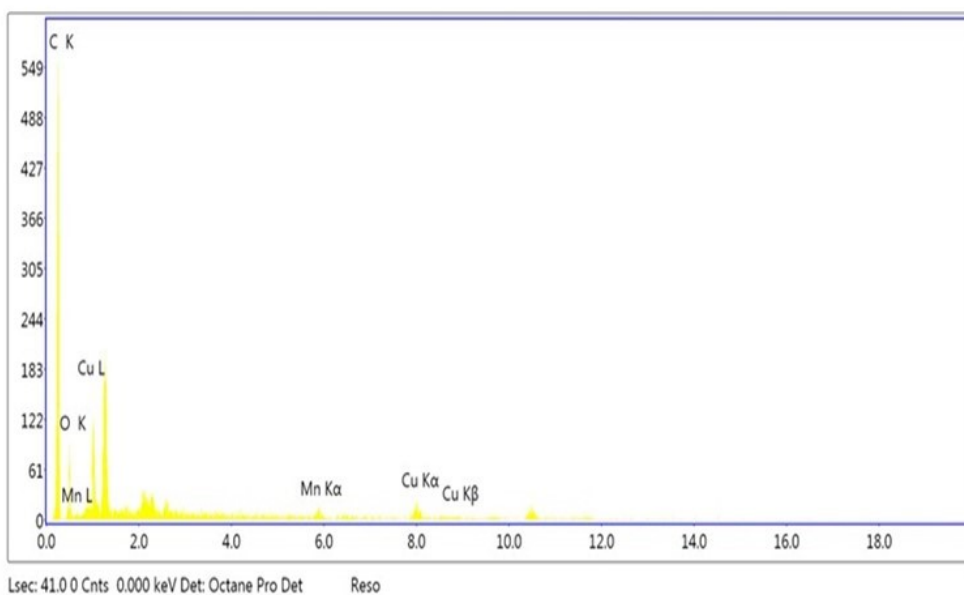

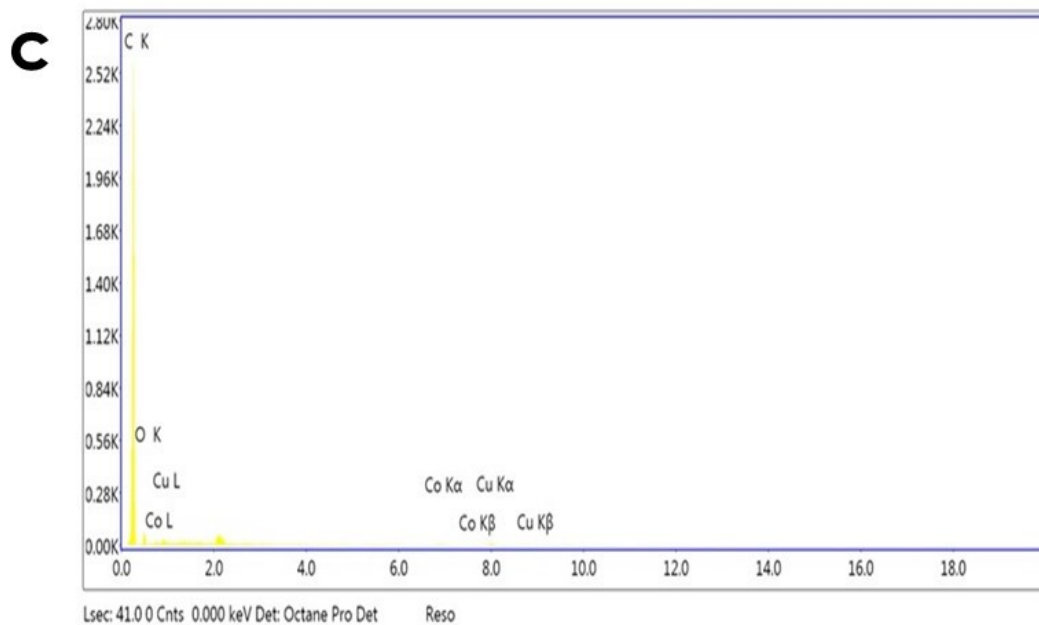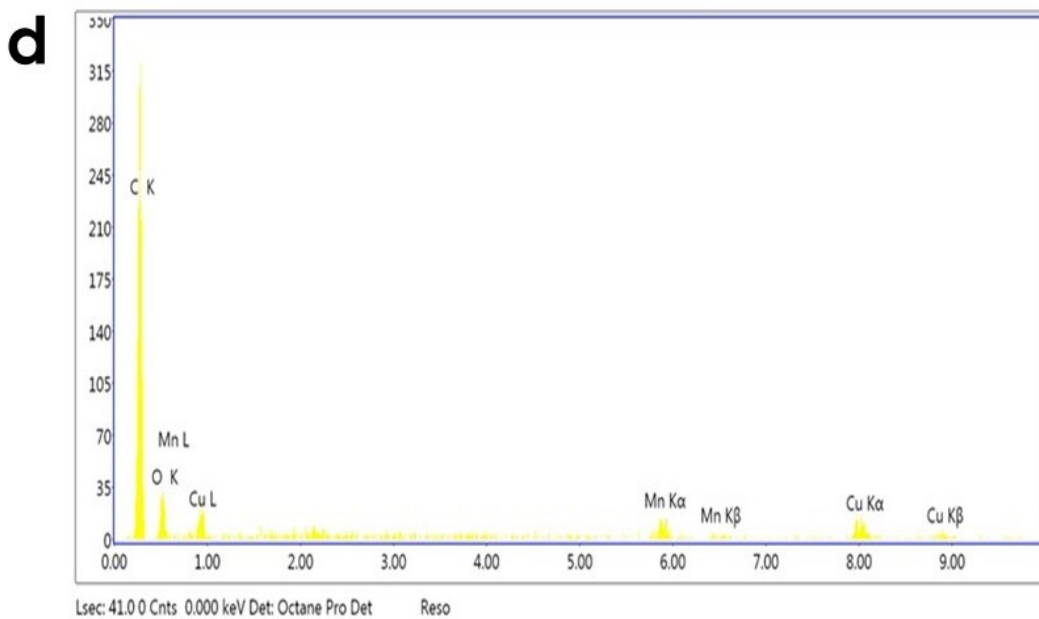

Figure S2. EDX spectra of (a) CoO-CuO/AC, (b) MnO<sub>2</sub>-CuO/AC, (c) CoO-CuO/G, (d) MnO<sub>2</sub>-CuO/G.

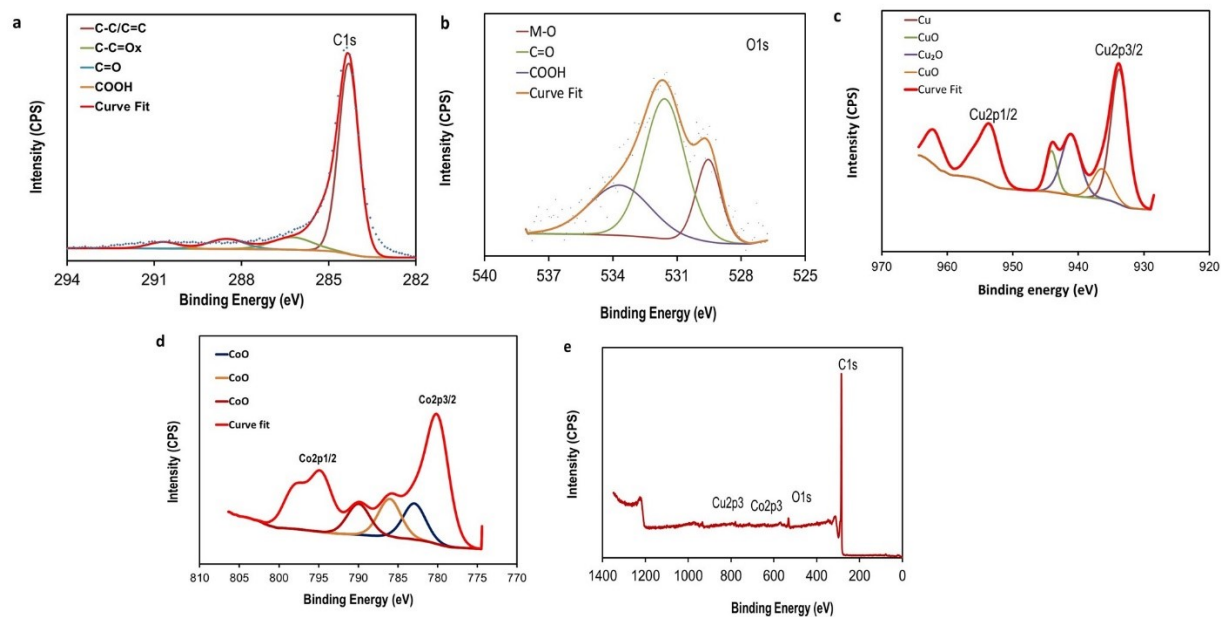

Figure S3. High-resolution XPS spectra of CoO-CuO/AC for (a) C 1s, (b) O 1s, (c) Cu 2p, and (a) (d) Mn 2p. (e) The XPS survey spectrum.

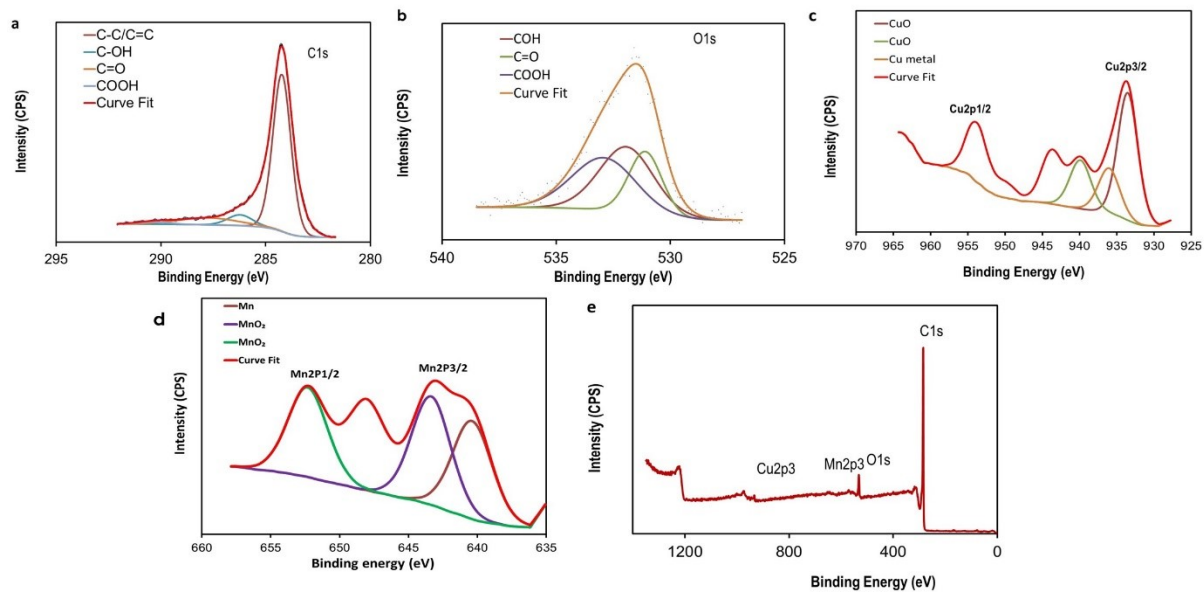

Figure S4. High-resolution XPS spectra of MnO<sub>2</sub>-CuO/G for (a) C 1s, (b) O 1s, (c) Cu 2p, and (a) (d) Mn 2p. (e) The XPS survey spectrum.

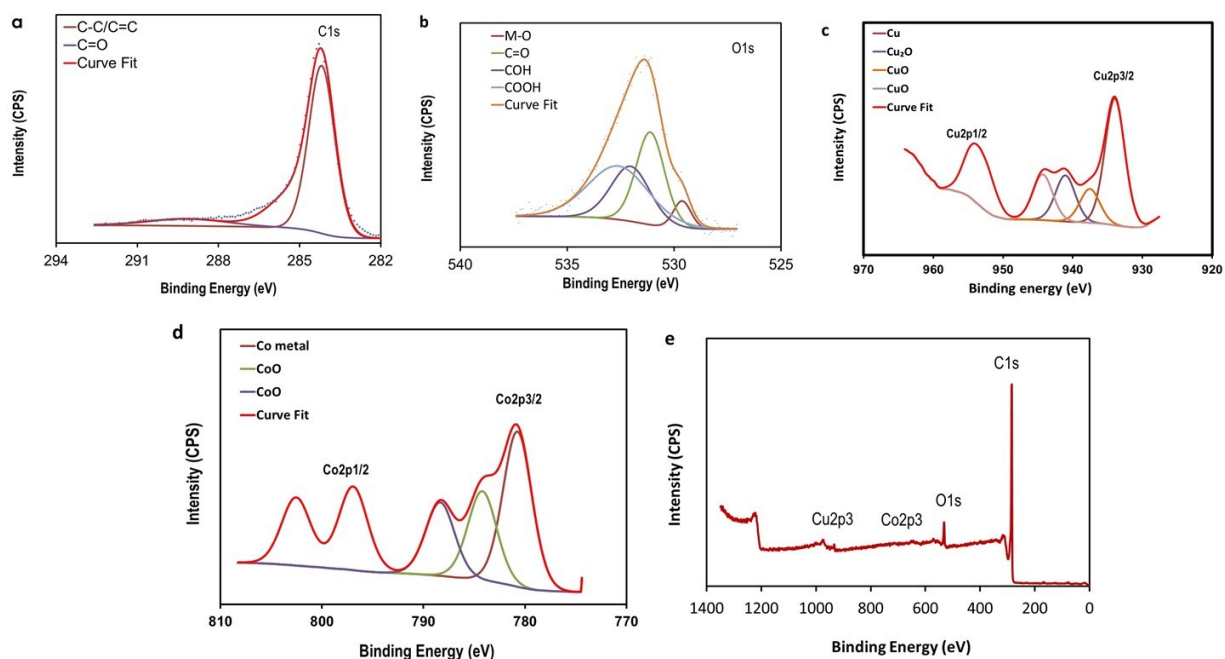

Figure S5. High-resolution XPS spectra of CoO-CuO/G for (a) C 1s, (b) O 1s, (c) Cu 2p, and (a) (d) Co 2p. (e) The XPS survey spectrum.
